# Supplementary material
Source: HighWire-hosted journal article supplement (https://rmdopen.bmj.com/content/9/1/e002741)
Supplement: inline-supplementary-material-1 [file inline-supplementary-material-1.pdf]

## Supplemental Material for

Oxidative stress involves phenotype modulation of morbid soreness symptoms in fibromyalgia

Chih-Hsien Hung, Ming-Hsien Tsai, Po-Sheng Wang, Fu-Wen Liang, Chung-Yao Hsu, Kuo-Wei Lee, Yi-On Fong, Der-Sheng Han, Cheng-Han Lee, Chiou-Lian Lai, Chih-Cheng Chen

To whom correspondence may be addressed. E-mail:[cilai@cc.kmu.edu.tw](mailto:cilai@cc.kmu.edu.tw),  
[chih@ibms.sinica.edu.tw](mailto:chih@ibms.sinica.edu.tw)

This PDF file includes:

Supplementary Methods and Materials

Figure S1-6

Table S1-12

## Supplementary Methods and Materials

### *Study participants*

All participants underwent routine laboratory examination to exclude disorders that would otherwise explain the pain, including testing for erythrocyte sedimentation rate, antinuclear antibody, rheumatoid factor, thyroid hormone, thyroid-stimulating hormone, alanine and aspartate aminotransferase, creatinine kinase, cortisol, and electrolytes. All participants with a final diagnosis of primary FM were followed for at least 6 months by outpatient services to ensure that no other etiology was identified. We prospectively recruited age- and sex-matched subjects without pain and soreness as healthy controls (HCs). Participants were asked to report their physical exertional events (such as intense labor or exercise) in the last 2 weeks. Exclusion criteria for both groups were the presence of systemic rheumatological or immune disorders (e.g., systemic lupus erythematosus, inflammatory myositis), systemic use of corticosteroids, current statin treatment, pregnancy, chronic diseases under poor control (e.g., diabetes mellitus, or chronic renal failure) and malignancies.

### *Blood collection and analyses*

Venous blood was collected from patients and controls at the first visit before pharmacotherapeutic intervention and placed in EDTA tubes. Blood was centrifuged at 3000 rpm for 15 min at 4°C to obtain plasma. Plasma samples were stored at -80°C.

To assess oxidative stress, thiobarbituric acid reactive substances (TBARS) were

determined in plasma samples with use of a commercial kit (Cayman, Ann Arbor, MI; item 700870). The lipid peroxidation level was expressed as nanomoles of malondialdehyde (MDA) formed per milliliter.

### *Metabolomics profiling*

Metabolomics profiling of plasma samples involved using an Agilent 1290 UHPLC system coupled with Agilent 6540 QTOF (Agilent Technologies, Santa Clara, CA). An amount of 2  $\mu$ L plasma extract was injected into an Acquity HSS T3 column (2.1  $\times$  100 mm, 1.8  $\mu$ m) (Waters, Milford, MA), with the apparatus temperature kept at 40 °C. The mobile phase involved solvent A (water/0.1% formic acid) and solvent B (acetonitrile/0.1% formic acid). The gradient elution program was 0–1.5 min: 2% B; 1.5–9 min: linear gradient from 2 to 50% B; 9–14 min: linear gradient from 50 to 95% B; and 3 min: maintenance in 95% B. The flow rate was kept at 300  $\mu$ L/min. For ionization, a Jet Stream electrospray ionization source was used for sample ionization. The following parameters were used throughout the study: 325° C gas temperature, 5 L/min gas flow, 40 psi nebulizer, 325°C sheath gas temperature, 10 L/min sheath gas flow, 40 kV in positive mode capillary voltage, and 120V fragmentation voltage. The mass scan range and acquisition rate were m/z 50–1700 and 2 Hz.

All data obtained with the Bruker system extracted with ion chromatography for

Hexakis (1H,1H,3H-perfluoropropoxy) phosphazene (m/z 922) were generated by using Bruker Data Analysis software. The peak area was then integrated for further analyses. For metabolic profiling, the metabolites were identified by using the in-house library with accurate mass and retention time by using Agilent MassHunter Profinder v6.0. The datasets containing m/z values, retention time and peak area were further analyzed.

*Statistical analysis of metabolomics data:*

Metabolomics analyses involved using SPSS v20 and the MetaboAnalyst 4.0 website service ([www.metaboanalyst.ca/](http://www.metaboanalyst.ca/))<sup>1</sup>. Non-parametric tests were used to identify metabolites with significant difference in peak intensities between FM and controls. The resulting  $p$  values were adjusted by the false discovery rate method of Benjamini–Hochberg for multiple testing <sup>2</sup>, with  $p < 0.02$  considered statistically significant. Kruskal-Wallis test was used to compare multiple groups (FM-P, FM-PS, and HCs).

PCA was used to evaluate intrinsic clustering and relevant subgroups. Sparse partial least squares discriminant analysis (sPLS-DA) was used to analyze the metabolomic expression for different groups by high-dimensional spectral features with multivariate PCA and further discrimination of inter-class variance between the groups. The variable importance in projection was constructed to provide a quantitative estimation of the importance of prominent metabolites that mostly contributed to the phenotypic

variability, and the score of these metabolites was depicted. Also, a heat map of the identified metabolites of interest was constructed, with hierarchical clustering of Euclidean distance applied to both participants and metabolites.

### *References*

1. Xia J, Wishart DS. Web-based inference of biological patterns, functions and pathways from metabolomic data using MetaboAnalyst. *Nat Protoc* 2011;6(6):743-60. doi: 10.1038/nprot.2011.319
2. Benjamini Y, Hochberg Y. Controlling the False Discovery Rate: A Practical and Powerful Approach to Multiple Testing. *Journal of the Royal Statistical Society: Series B (Methodological)* 1995;57(1):289-300. doi: 10.1111/j.2517-6161.1995.tb02031.x

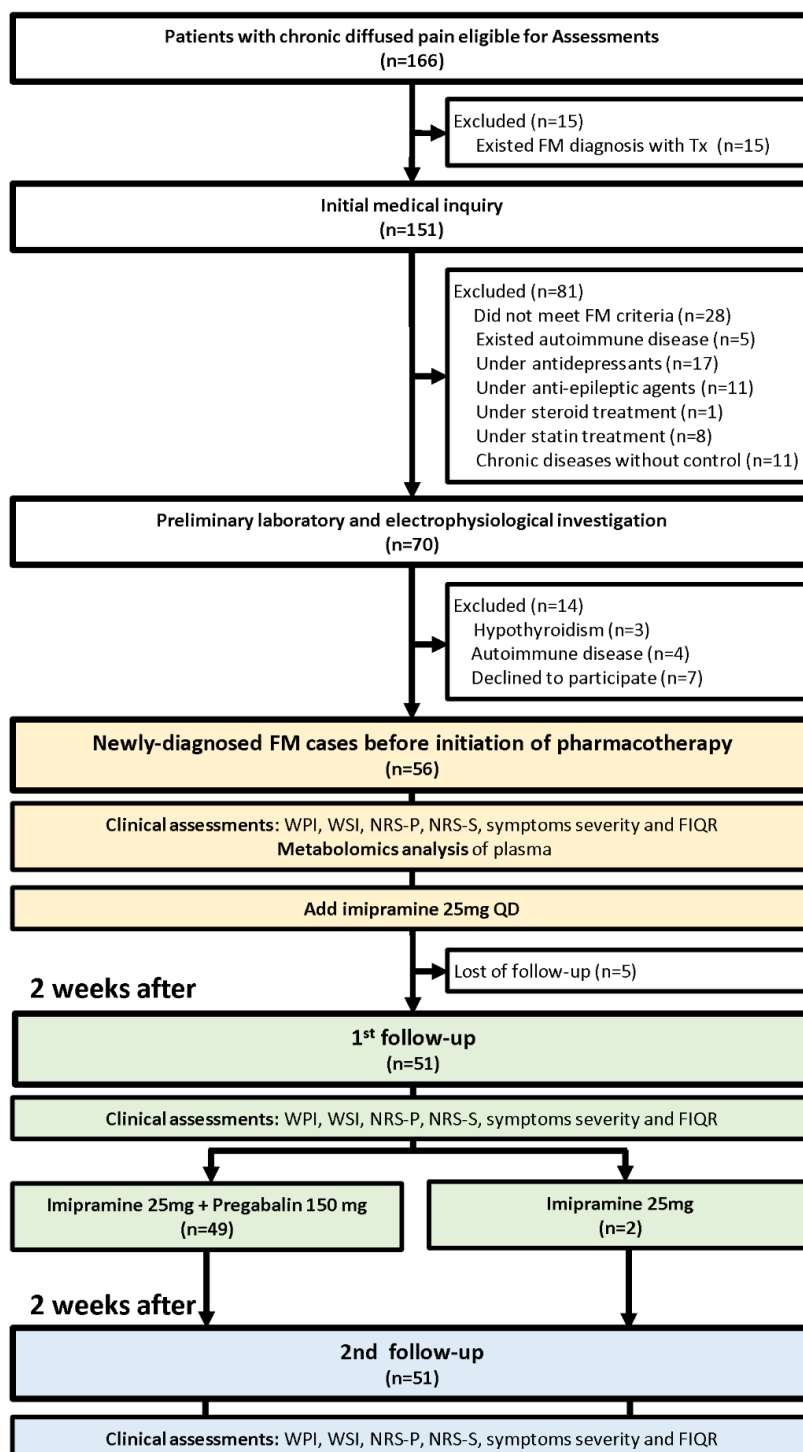

**Figure S1.** Diagram of patient recruitment. WPI, widespread pain index. WSI, widespread soreness index. NRS-P, numeric rating scale for pain. NRS-S, numeric rating scale for soreness. FIQR, the Revised Fibromyalgia Impact Questionnaire. QD, daily.

**A** Please indicate below if you have had **pain** or **tenderness** over the past 7 days in each of the areas listed below.

|              | Left                     | Right                    |                |                          |
|--------------|--------------------------|--------------------------|----------------|--------------------------|
| 1. Jaw       | <input type="checkbox"/> | <input type="checkbox"/> | 8. Chest       | <input type="checkbox"/> |
| 2. Shoulder  | <input type="checkbox"/> | <input type="checkbox"/> | 9. Abdomen     | <input type="checkbox"/> |
| 3. Upper arm | <input type="checkbox"/> | <input type="checkbox"/> | 10. Neck       | <input type="checkbox"/> |
| 4. Lower arm | <input type="checkbox"/> | <input type="checkbox"/> | 11. Upper back | <input type="checkbox"/> |
| 5. Upper leg | <input type="checkbox"/> | <input type="checkbox"/> | 12. Lower back | <input type="checkbox"/> |
| 6. Lower leg | <input type="checkbox"/> | <input type="checkbox"/> |                |                          |
| 7. Hip       | <input type="checkbox"/> | <input type="checkbox"/> |                |                          |

**B** Please indicate below if you have had **soreness** over the past 7 days in each of the areas listed below.

|              | Left                     | Right                    |                |                          |
|--------------|--------------------------|--------------------------|----------------|--------------------------|
| 1. Jaw       | <input type="checkbox"/> | <input type="checkbox"/> | 8. Chest       | <input type="checkbox"/> |
| 2. Shoulder  | <input type="checkbox"/> | <input type="checkbox"/> | 9. Abdomen     | <input type="checkbox"/> |
| 3. Upper arm | <input type="checkbox"/> | <input type="checkbox"/> | 10. Neck       | <input type="checkbox"/> |
| 4. Lower arm | <input type="checkbox"/> | <input type="checkbox"/> | 11. Upper back | <input type="checkbox"/> |
| 5. Upper leg | <input type="checkbox"/> | <input type="checkbox"/> | 12. Lower back | <input type="checkbox"/> |
| 6. Lower leg | <input type="checkbox"/> | <input type="checkbox"/> |                |                          |
| 7. Hip       | <input type="checkbox"/> | <input type="checkbox"/> |                |                          |

**Figure S2.** Questionnaires of widespread pain index (A) and widespread soreness index (B).

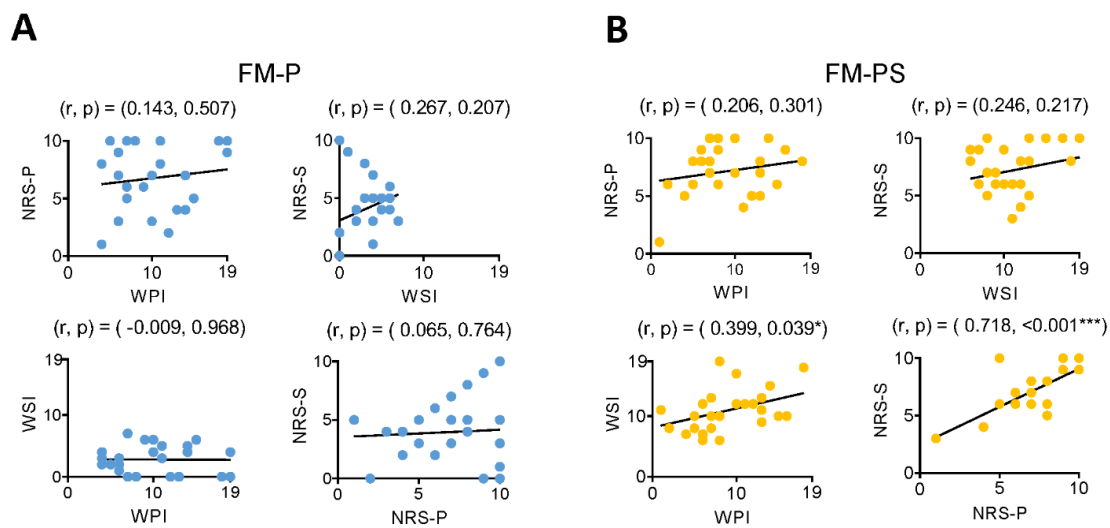

**Figure S3.** Correlation analysis of NRS-P, NRS-S, WPI and WSI in FM-P (A) and FM-PS (B) (Pearson correlation test).



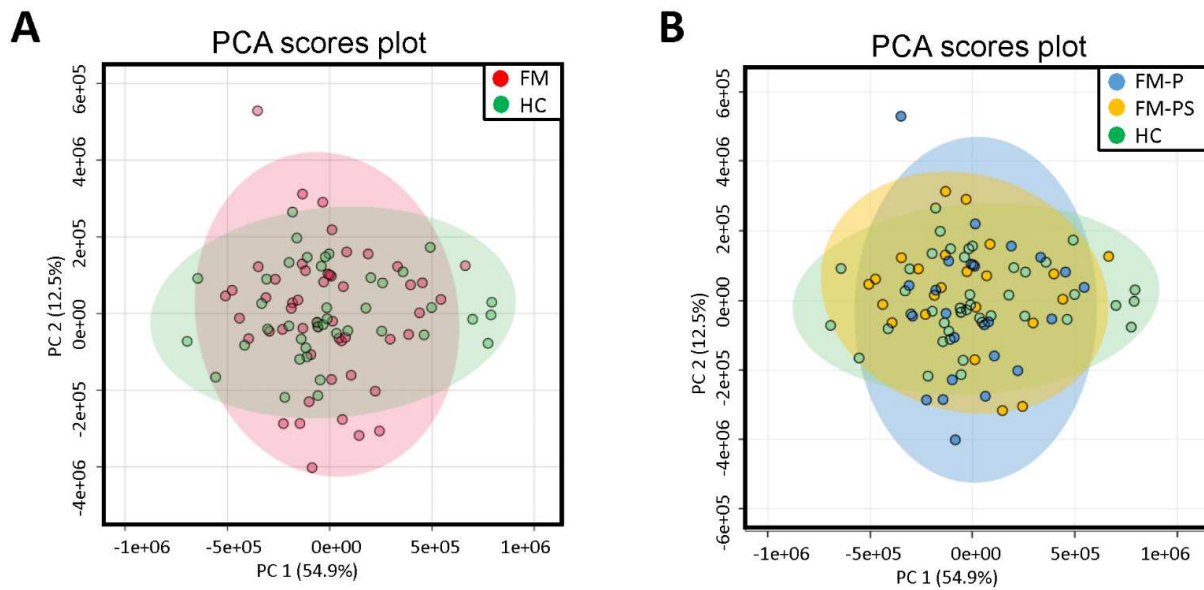

**Figure S4.** Principal component analysis score plot based on metabolomic analysis of plasma from FM patients and HCs (A) and FM-P, FM-PS and HCs (B). FM, fibromyalgia. HCs, healthy controls. FM-P, fibromyalgia with pain dominant symptoms. FM-PS, fibromyalgia with mixed pain and soreness symptoms.

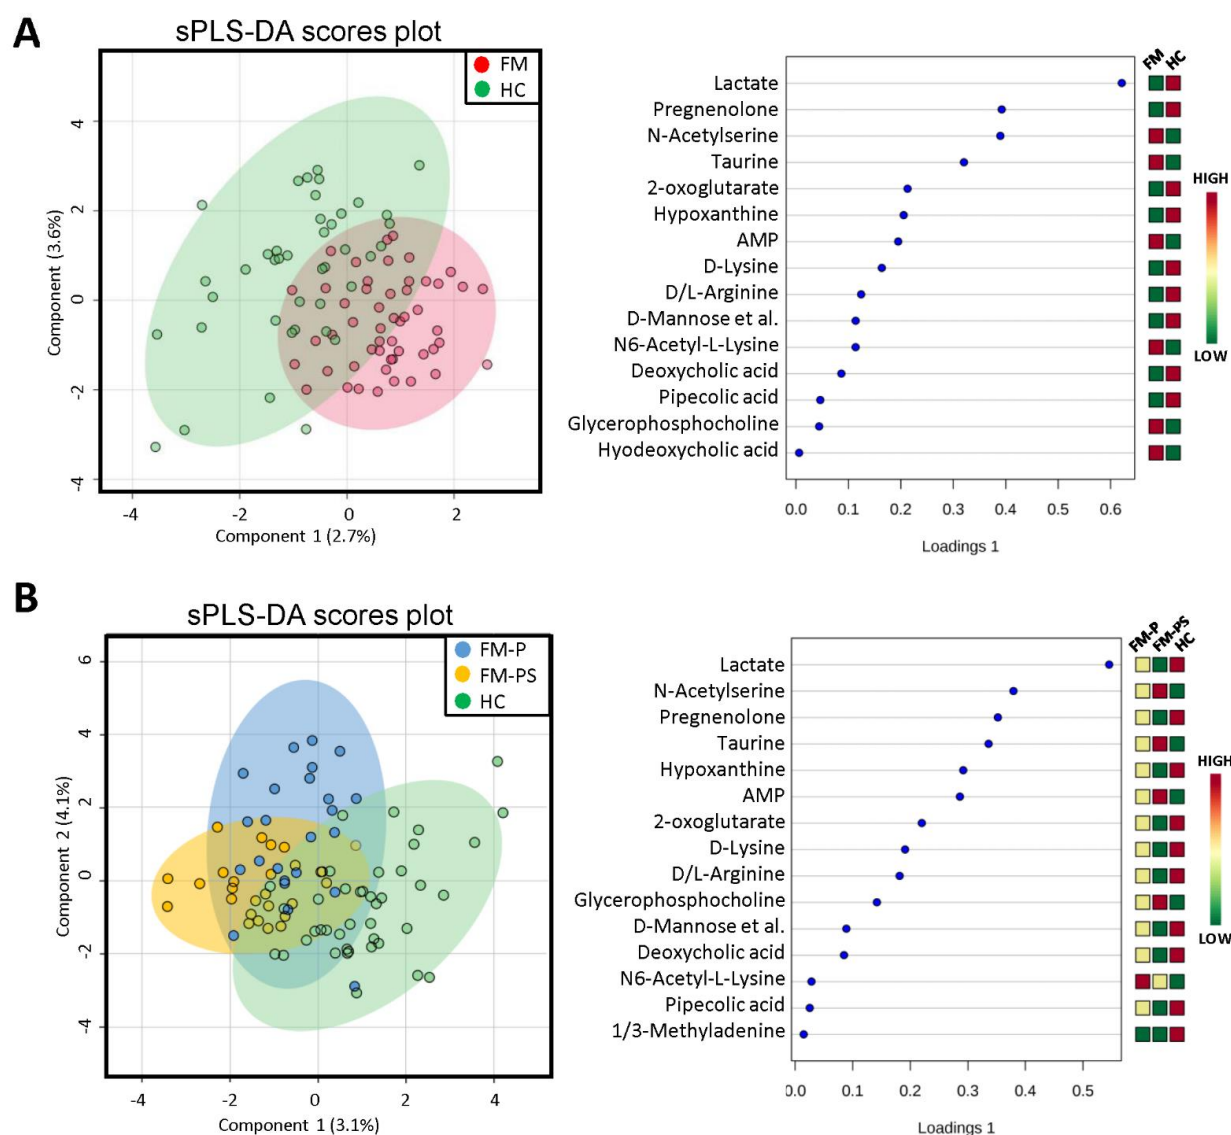

**Figure S5.** Metabolomic differences in FM-PS but not FM-P groups as compared with HCs. **(A)** Sparse partial least squares discriminant analysis (sPLS-DA) based on metabolomic profiling of plasma from FM patients and HCs. Left, score plot of sPLS-DA. Right, loading plot of sPLS-DA component 1 and the 15 most discriminative variables selected by the sPLS-DA model for this component. **(B)** sPLS-DA based on metabolomic profiling of plasma from FM-P, FM-PS and HC participants. Left, score plot of sPLS-DA. Right, loading plot of sPLS-DA component 1 and the 15 most discriminative variables selected by the sPLS-DA model for this component.

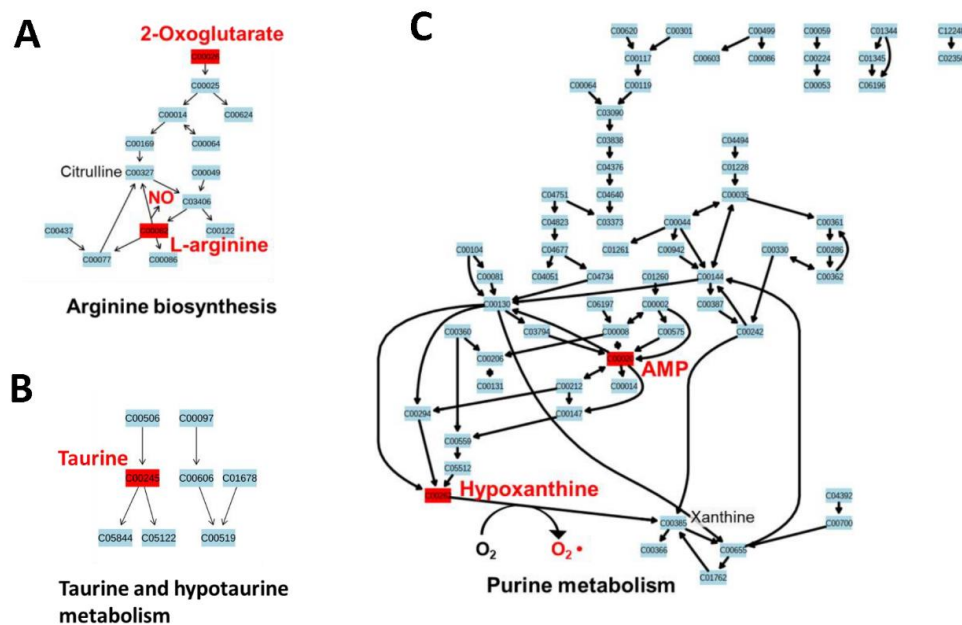

**Figure S6.** Biologically meaningful pathways selected by pathway analysis and the involved metabolites in FM. Pathways with statistical significance and impact values above the defined threshold (0.05) in the bubble plot (Fig. 3A) were identified as pathway targets, including arginine biosynthesis pathway (**A**), taurine and hypotaurine metabolism pathway (**B**), and purine metabolism pathway (**C**). Two of the three identified pathways (purine metabolism and arginine biosynthesis) involved cellular oxidative metabolism, such as superoxide ( $O_2^{\bullet-}$ ) and nitric oxide (NO) synthesis.

**Table S1.** Correlation analysis of pain and soreness manifestation in given regions

|                 | R<br>jaw | L<br>jaw | R<br>shoulder | L<br>shoulder | R<br>arm | L<br>arm | R<br>forearm | L<br>forearm | R<br>hip | L<br>hip |
|-----------------|----------|----------|---------------|---------------|----------|----------|--------------|--------------|----------|----------|
| Pearson r value | 0.267    | 0.186    | 0.048         | 0.037         | 0.046    | -0.165   | 0.103        | 0.038        | 0.031    | 0.161    |
| <i>p</i> value  | 0.058    | 0.190    | 0.754         | 0.749         | 0.747    | 0.246    | 0.471        | 0.793        | 0.828    | 0.258    |

|                 | R<br>thigh | L<br>thigh | R<br>leg | L<br>leg | Up<br>back | Low back | Neck  | Chest | Abd.  |  |
|-----------------|------------|------------|----------|----------|------------|----------|-------|-------|-------|--|
| Pearson r value | -0.005     | 0.131      | 0.046    | 0.230    | 0.005      | -0.116   | 0.188 | 0.164 | 0.291 |  |
| <i>p</i> value  | 0.974      | 0.361      | 0.751    | 0.105    | 0.973      | 0.058    | 0.186 | 0.250 | 0.038 |  |

Pearson correlation analysis.

**Table S2.** Clinical impacts of pain and soreness on FM symptoms

| FIQR     | Numeric rating score |                         |                 |                         |
|----------|----------------------|-------------------------|-----------------|-------------------------|
|          | Pain                 |                         | Soreness        |                         |
|          | Item                 | ( <i>r</i> , <i>p</i> ) | Item            | ( <i>r</i> , <i>p</i> ) |
| Domain 1 |                      |                         | Sit for 45 mins | (0.425, 0.002*)         |
| subtotal |                      | (0.146, 0.307)          |                 | (0.081, 0.574)          |
| Domain 2 |                      |                         |                 |                         |
| subtotal |                      | (0.395, 0.004*)         |                 | (0.238, 0.092)          |
| Domain 3 | Fatigue              | (0.469, 0.001*)         | Stiffness       | (0.317, 0.023*)         |
|          | Allodynia            | (0.391, 0.005*)         |                 |                         |
|          | Insomnia             | (0.307, 0.028*)         |                 |                         |
| subtotal |                      | (0.520, 0.000*)         |                 | (0.220, 0.121)          |
| Sum      |                      | (0.434, 0.001*)         |                 | (0.216, 0.128)          |

Pearson correlation analysis. *r*, Pearson correlation coefficient. *p*, *p*-value. \*statistically significant. FIQR, the Revised Fibromyalgia Impact Questionnaire. Domain 1, evaluation of function. Domain 2, evaluation of disease overall impact. Domain 3, evaluation of disease symptoms.

**Table S3.** Therapeutic responses in patients with fibromyalgia

| Variable                        | Rating score (mean $\pm$ SD) |                     |                     | p value             |
|---------------------------------|------------------------------|---------------------|---------------------|---------------------|
|                                 | Basal                        | 1 <sup>st</sup> f/u | 2 <sup>nd</sup> f/u |                     |
| <b>Pain / soreness symptoms</b> |                              |                     |                     |                     |
| WPI                             | 9.55 $\pm$ 4.39              | 6.96 $\pm$ 4.90*    | 6.90 $\pm$ 4.91*    | 0.007 <sup>‡</sup>  |
| WSI                             | 7.12 $\pm$ 5.05              | 5.57 $\pm$ 4.61     | 5.73 $\pm$ 4.55     | 0.196               |
| NRS-P                           | 6.96 $\pm$ 2.47              | 5.04 $\pm$ 2.83**   | 4.88 $\pm$ 2.77***  | <0.001 <sup>‡</sup> |
| NRS-S                           | 5.67 $\pm$ 2.88              | 4.29 $\pm$ 2.87*    | 4.33 $\pm$ 2.83     | 0.024               |
| <b>Symptom severity</b>         |                              |                     |                     |                     |
| Cognitive disturbance           | 1.51 $\pm$ 0.93              | 1.12 $\pm$ 0.74     | 1.12 $\pm$ 0.86     | 0.028               |
| Fatigue                         | 2.04 $\pm$ 0.80              | 1.76 $\pm$ 0.74     | 1.78 $\pm$ 0.83     | 0.151               |
| Waking up tired                 | 2.20 $\pm$ 0.80              | 1.63 $\pm$ 0.89**   | 1.73 $\pm$ 0.85*    | 0.002 <sup>‡</sup>  |
| Headache                        | 0.86 $\pm$ 0.35              | 0.90 $\pm$ 0.36     | 0.78 $\pm$ 0.42     | 0.277               |
| GI symptoms                     | 0.61 $\pm$ 0.49              | 0.49 $\pm$ 0.54     | 0.39 $\pm$ 0.49     | 0.105               |
| Depression                      | 0.71 $\pm$ 0.46              | 0.66 $\pm$ 0.52     | 0.61 $\pm$ 0.49     | 0.603               |
| Sum                             | 7.92 $\pm$ 2.15              | 6.55 $\pm$ 2.45**   | 6.41 $\pm$ 2.64*    | 0.003 <sup>‡</sup>  |
| <b>FIQR</b>                     |                              |                     |                     |                     |
| Domain 1                        | 29.06 $\pm$ 23.56            | 24.73 $\pm$ 19.87   | 23.92 $\pm$ 20.26   | 0.426               |
| Domain 2                        | 12.67 $\pm$ 6.46             | 8.90 $\pm$ 6.80*    | 7.92 $\pm$ 6.71**   | 0.001 <sup>‡</sup>  |
| Domain 3                        | 62.61 $\pm$ 17.08            | 57.69 $\pm$ 21.93   | 52.08 $\pm$ 21.03*  | 0.033               |
| Sum                             | 53.66 $\pm$ 18.76            | 45.99 $\pm$ 20.43   | 41.93 $\pm$ 20.76*  | 0.012 <sup>‡</sup>  |

WPI, widespread pain index. WSI, widespread soreness index. NRS-P, numeric rating scale for pain. NRS-S, numeric rating scale for soreness. FIQR, the Revised Fibromyalgia Impact Questionnaire. SD, standard deviation. f/u, follow-up. The resulting p values for the items of each questionnaire were adjusted by the Bonferroni correction, with p <0.0125 considered statistically significant for pain/soreness symptoms, p <0.0071 for symptom severity and p <0.0125 for FIQR. <sup>‡</sup>, statistically significant. One-way ANOVA with post-hoc analysis (Dunnett). \* p<0.05, \*\* p<0.01, \*\*\*p<0.001 post-hoc analysis compared with basal.

**Table S4.** A comparison of comorbidity and disease severity based on the subgroups of fibromyalgia

| Variable                               | FM-P (n=24)   | FM-PS (n=27)  | p-value |
|----------------------------------------|---------------|---------------|---------|
| Age                                    | 54.79 ± 13.76 | 42.15 ± 11.09 | 0.001   |
| Gender (F / M)                         | 22 / 2        | 23 / 4        | 0.473   |
| NRS-P                                  | 6.71 ± 2.93   | 7.15 ± 2.14   | 0.540   |
| NRS-S                                  | 3.96 ± 2.79   | 7.19 ± 1.98   | <0.001  |
| WPI                                    | 9.96 ± 4.71   | 8.96 ± 4.54   | 0.446   |
| WSI                                    | 2.79 ± 2.32   | 10.96 ± 3.41  | <0.001  |
| Symptom Severity - Sum                 | 8.25 ± 2.21   | 7.63 ± 2.10   | 0.309   |
| Cognitive disturbance                  | 1.67 ± 0.92   | 1.37 ± 0.93   | 0.257   |
| Fatigue                                | 2.04 ± 0.86   | 2.04 ± 0.76   | 0.984   |
| Sleep disturbance                      | 2.33 ± 0.87   | 2.07 ± 0.73   | 0.252   |
| Headache                               | 0.92 ± 0.28   | 0.81 ± 0.40   | 0.301   |
| GI symptoms                            | 0.46 ± 0.51   | 0.74 ± 0.45   | 0.040   |
| Depression                             | 0.83 ± 0.38   | 0.59 ± 0.50   | 0.061   |
| FIQR                                   |               |               |         |
| Domain 1                               | 31.75 ± 26.07 | 26.67 ± 21.29 | 0.447   |
| Brush or comb hair                     | 0.54 ± 0.98   | 0.69 ± 1.67   | 0.837   |
| Walk continuously for 20 mins          | 3.61 ± 3.84   | 2.89 ± 3.40   | 0.485   |
| Prepare a homemade meal                | 3.17 ± 3.74   | 3.11 ± 3.86   | 0.959   |
| Vacuum, scrub or weep floor            | 4.92 ± 4.15   | 4.07 ± 3.30   | 0.424   |
| Lift and carry a bag full of groceries | 4.96 ± 4.03   | 4.44 ± 3.78   | 0.622   |
| Climb one flight of stairs             | 3.63 ± 3.40   | 1.93 ± 2.92   | 0.061   |
| Change Bedsheets                       | 4.08 ± 4.03   | 2.96 ± 3.43   | 0.289   |
| Sit in a chair for 45 minutes          | 3.00 ± 3.30   | 3.56 ± 3.68   | 0.575   |
| Shop for groceries                     | 3.50 ± 3.23   | 2.63 ± 3.69   | 0.383   |
| Domain 2                               | 13.13 ± 7.57  | 12.26 ± 5.42  | 0.638   |
| Domain 3                               | 63.83 ± 20.14 | 61.52 ± 14.13 | 0.634   |
| Sum                                    | 55.62 ± 21.20 | 51.91 ± 16.50 | 0.486   |

FM-P, fibromyalgia with pain dominant symptoms. FM-PS, fibromyalgia with mixed pain and soreness symptoms. WPI, widespread pain index. WSI, widespread soreness index. NRS-P, numeric rating scale for pain. NRS-S, numeric rating scale for soreness. FIQR, the Revised Fibromyalgia Impact Questionnaire. Values are mean ± SD. Chi-square test for tests of gender and relieving factors, and unpaired t test for other tests.

**Table S5.** Presentation of pain and soreness symptoms in the body regions between FM subgroups

| Region               | Pain (%) |       |         | Soreness (%) |       |         |
|----------------------|----------|-------|---------|--------------|-------|---------|
|                      | FM-P     | FM-PS | p value | FM-P         | FM-PS | p value |
| Head                 | 45.8     | 40.7  | 0.714   | 8.3          | 40.7  | 0.008   |
| Lt upper limb        | 87.5     | 85.2  | 0.811   | 29.2         | 96.3  | <0.001  |
| Rt upper limb        | 83.3     | 85.2  | 0.856   | 33.3         | 92.6  | <0.001  |
| Upper back and spine | 87.5     | 77.8  | 0.363   | 25           | 77.8  | <0.001  |
| Lower back and spine | 75       | 85.2  | 0.360   | 41.7         | 85.2  | 0.001   |
| Lt lower limb        | 50       | 55.6  | 0.692   | 29.2         | 81.5  | <0.001  |
| Rt lower limb        | 54.2     | 48.1  | 0.668   | 33.3         | 74.1  | 0.004   |
| Chest                | 33.3     | 44.4  | 0.417   | 0            | 25.9  | 0.007   |
| Abdomen              | 25       | 48.1  | 0.088   | 0            | 18.5  | 0.026   |

FM-P, fibromyalgia with pain dominant symptoms. FM-PS, fibromyalgia with mixed pain and soreness symptoms. Chi-squared test.



**Table S6.** Correlation analysis of regional pain and soreness manifestations in FM-P

|                        | R     | L     | R        | L        | R     | L      | R       | L       | R     | L      |
|------------------------|-------|-------|----------|----------|-------|--------|---------|---------|-------|--------|
|                        | jaw   | jaw   | shoulder | shoulder | arm   | arm    | forearm | forearm | hip   | hip    |
| Pearson <i>r</i> value | 0.078 | 0.107 | 0.193    | 0.194    | 0.134 | −0.312 | −0.076  | −0.302  | 0.227 | −0.126 |
| <i>p</i> value         | 0.718 | 0.620 | 0.365    | 0.364    | 0.533 | 0.138  | 0.726   | 0.151   | 0.287 | 0.557  |

|                        | R     | L     | R     | L     | Up     | Low back | Neck  | Chest | Abd.  |  |
|------------------------|-------|-------|-------|-------|--------|----------|-------|-------|-------|--|
|                        | thigh | thigh | leg   | leg   | back   |          |       |       |       |  |
| Pearson <i>r</i> value | 0.048 | 0.098 | 0.122 | 0.193 | −0.393 | −0.449   | 0.000 | 1.000 | 1.000 |  |
| <i>p</i> value         | 0.823 | 0.650 | 0.569 | 0.365 | 0.058  | 0.036    | 1.000 | —     | —     |  |

FM-P, fibromyalgia with pain dominant symptoms. Pearson correlation analysis.

**Table S7.** Correlation analysis of regional pain and soreness manifestations in FM-PS

|                        | R     | L     | R        | L        | R     | L     | R       | L       | R     | L     |
|------------------------|-------|-------|----------|----------|-------|-------|---------|---------|-------|-------|
|                        | jaw   | jaw   | shoulder | shoulder | arm   | arm   | forearm | forearm | hip   | hip   |
| Pearson <i>r</i> value | 0.434 | 0.287 | −0.286   | −0.025   | 0.426 | 0.189 | 0.377   | 0.336   | 0.189 | 0.373 |
| <i>p</i> value         | 0.024 | 0.146 | 0.149    | 0.900    | 0.027 | 0.345 | 0.052   | 0.087   | 0.345 | 0.055 |

|                        | R     | L     | R     | L     | Up    | Low back | Neck  | Chest | Abd.  |  |
|------------------------|-------|-------|-------|-------|-------|----------|-------|-------|-------|--|
|                        | thigh | thigh | leg   | leg   | back  |          |       |       |       |  |
| Pearson <i>r</i> value | 0.107 | 0.267 | 0.052 | 0.223 | 0.053 | 0.067    | 0.342 | 0.197 | 0.304 |  |
| <i>p</i> value         | 0.597 | 0.179 | 0.795 | 0.264 | 0.792 | 0.738    | 0.081 | 0.323 | 0.123 |  |

FM-PS, fibromyalgia with mixed pain and soreness symptoms. Pearson correlation analysis.

**Table S8.** Clinical impacts of pain and soreness on FM symptoms based on the subgroups of fibromyalgia

| FIQR     | FM-P (n=24) |                                  |                 |                                  | FM-PS (n=27) |                                  |                 |                                  |
|----------|-------------|----------------------------------|-----------------|----------------------------------|--------------|----------------------------------|-----------------|----------------------------------|
|          | Item        | NRS-P<br>( <i>r</i> , <i>p</i> ) | Item            | NRS-S<br>( <i>r</i> , <i>p</i> ) | Item         | NRS-P<br>( <i>r</i> , <i>p</i> ) | Item            | NRS-S<br>( <i>r</i> , <i>p</i> ) |
| Domain 1 |             |                                  | Brush hair      | (0.556, 0.007*)                  |              |                                  | Sit for 45 mins | (0.524, 0.009*)                  |
|          |             |                                  | Sit for 45 mins | (0.426, 0.048*)                  |              |                                  |                 |                                  |
| subtotal |             | (0.103, 0.649)                   |                 | (0.117, 0.605)                   |              | (0.286, 0.175)                   |                 | (-0.013, 0.953)                  |
| Domain 2 |             |                                  |                 |                                  |              |                                  |                 |                                  |
| subtotal |             | (0.141, 0.532)                   |                 | (0.293, 0.186)                   |              | (0.722, <0.001*)                 |                 | (0.410, 0.047*)                  |
| Domain 3 | Fatigue     | (0.542, 0.009*)                  |                 |                                  |              |                                  |                 |                                  |
|          | Insomnia    | (0.486, 0.022*)                  |                 |                                  |              |                                  |                 |                                  |
|          | Allodynia   | (0.476, 0.025*)                  |                 |                                  |              |                                  |                 |                                  |
| subtotal |             | (0.605, 0.003*)                  |                 | (0.388, 0.075)                   |              | (0.395, 0.056)                   |                 | (0.120, 0.576)                   |
| Sum      |             | (0.383, 0.078)                   |                 | (0.341, 0.121)                   |              | (0.511, 0.011*)                  |                 | (0.171, 0.424)                   |

Correlation analyses of symptom intensity and FIQR scores. NRS-P, numeric rating scale for pain. NRS-S, numeric rating scale for soreness. FM-P, fibromyalgia with pain dominant symptoms. FM-PS, fibromyalgia with mixed pain and soreness symptoms. FIQR, the Revised Fibromyalgia Impact Questionnaire. Domain 1, evaluation of function. Domain 2, evaluation of disease overall impact. Domain 3, evaluation of disease symptoms. *r*, Pearson correlation coefficient *r*. *p*, *p* value. \*statistically significant.

**Table S9.** Comparison of therapeutic responses in the subgroups of fibromyalgia

|                         | Rating score (mean $\pm$ SD) |                   |                    |                    |                   |                   |                   |                |
|-------------------------|------------------------------|-------------------|--------------------|--------------------|-------------------|-------------------|-------------------|----------------|
|                         | FM-P (n=24)                  |                   |                    |                    | FM-PS (n=27)      |                   |                   |                |
|                         | Basal                        | 1st f/u           | 2nd f/u            | <i>p</i> value     | Basal             | 1st f/u           | 2nd f/u           | <i>p</i> value |
| <b>Symptom severity</b> |                              |                   |                    |                    |                   |                   |                   |                |
| Cognitive disturbance   | 1.67 $\pm$ 0.92              | 0.96 $\pm$ 0.55*  | 0.88 $\pm$ 0.85*   | 0.001 <sup>‡</sup> | 1.37 $\pm$ 0.93   | 1.26 $\pm$ 0.86   | 1.33 $\pm$ 0.83   | 0.893          |
| Fatigue                 | 2.04 $\pm$ 0.86              | 1.75 $\pm$ 0.85   | 1.67 $\pm$ 0.92    | 0.303              | 2.04 $\pm$ 0.76   | 1.78 $\pm$ 0.64   | 1.89 $\pm$ 0.75   | 0.417          |
| Waking up tired         | 2.33 $\pm$ 0.87              | 1.46 $\pm$ 1.02** | 1.50 $\pm$ 0.93**  | 0.002 <sup>‡</sup> | 2.07 $\pm$ 0.73   | 1.78 $\pm$ 0.75   | 1.93 $\pm$ 0.73   | 0.341          |
| Headache                | 0.92 $\pm$ 0.28              | 0.83 $\pm$ 0.48   | 0.75 $\pm$ 0.44    | 0.378              | 0.81 $\pm$ 0.40   | 0.96 $\pm$ 0.19   | 0.81 $\pm$ 0.40   | 0.191          |
| GI symptoms             | 0.46 $\pm$ 0.51              | 0.38 $\pm$ 0.58   | 0.25 $\pm$ 0.44    | 0.371              | 0.74 $\pm$ 0.45   | 0.59 $\pm$ 0.50   | 0.52 $\pm$ 0.51   | 0.238          |
| Depression              | 0.83 $\pm$ 0.38              | 0.74 $\pm$ 0.54   | 0.67 $\pm$ 0.48    | 0.474              | 0.59 $\pm$ 0.50   | 0.59 $\pm$ 0.50   | 0.56 $\pm$ 0.51   | 0.952          |
| Sum                     | 8.25 $\pm$ 2.21              | 6.08 $\pm$ 2.94*  | 5.71 $\pm$ 2.90**  | 0.003 <sup>‡</sup> | 7.63 $\pm$ 2.10   | 6.96 $\pm$ 1.87   | 7.04 $\pm$ 2.26   | 0.439          |
| <b>FIQR</b>             |                              |                   |                    |                    |                   |                   |                   |                |
| Domain 1                | 31.75 $\pm$ 26.07            | 24.88 $\pm$ 22.57 | 24.58 $\pm$ 23.11  | 0.506              | 26.67 $\pm$ 21.29 | 24.59 $\pm$ 17.55 | 23.33 $\pm$ 17.79 | 0.809          |
| Domain 2                | 13.13 $\pm$ 7.57             | 8.67 $\pm$ 7.35   | 6.33 $\pm$ 6.43**  | 0.005 <sup>‡</sup> | 12.26 $\pm$ 5.42  | 9.11 $\pm$ 6.41   | 9.33 $\pm$ 6.77   | 0.123          |
| Domain 3                | 63.83 $\pm$ 20.14            | 55.54 $\pm$ 25.64 | 47.67 $\pm$ 24.49* | 0.066              | 61.52 $\pm$ 14.13 | 59.59 $\pm$ 18.32 | 56.00 $\pm$ 16.90 | 0.465          |
| Sum                     | 55.62 $\pm$ 21.20            | 44.73 $\pm$ 23.74 | 38.36 $\pm$ 23.41* | 0.035              | 51.91 $\pm$ 16.50 | 47.10 $\pm$ 17.36 | 45.11 $\pm$ 17.93 | 0.337          |

One-way ANOVA with post-hoc analysis (Dunnett). The resulting *p* values for the items of each questionnaire were adjusted by the Bonferroni correction, with *p* < 0.0071 considered statistically significant for symptom severity and *p* < 0.0125 for FIQR. <sup>‡</sup>, statistically significant. \* *p* < 0.05, \*\* *p* < 0.05, \*\*\**p* < 0.001 post-hoc analysis (Dunnett) compared with basal. f/u, follow-up. SD, standard deviation. FM-P, fibromyalgia with pain dominant symptoms. FM-PS, fibromyalgia with mixed pain and soreness symptoms. FIQR, the Revised Fibromyalgia Impact Questionnaire.

**Table S10** Significantly dysregulated metabolites in patients with fibromyalgia as compared with healthy controls

| Metabolites                    | Adduct               | ion (m/z) | Fold change<br>(FM / HC) | <i>p</i> value |
|--------------------------------|----------------------|-----------|--------------------------|----------------|
| <b>Upregulation</b>            |                      |           |                          |                |
| Adenosine monophosphate        | [M + H] <sup>+</sup> | 348.07    | 7.96                     | 0.008          |
| N6-Acetyl-L-Lysine             | [M + H] <sup>+</sup> | 189.123   | 1.82                     | 0.014          |
| N-Acetylserine   Glutamic acid | [M + H] <sup>+</sup> | 148.06    | 1.51                     | <0.001         |
| Taurine                        | [M + H] <sup>+</sup> | 126.022   | 21.33                    | 0.002          |
| <b>Downregulation</b>          |                      |           |                          |                |
| 2-Oxoglutarate                 | [M - H] <sup>-</sup> | 145.014   | 0.46                     | 0.018          |
| D-Lysine                       | [M + H] <sup>+</sup> | 147.11    | 0.33                     | 0.011          |
| D/L-Arginine                   | [M + H] <sup>+</sup> | 175.119   | 0.43                     | 0.014          |
| Hypoxanthine                   | [M + H] <sup>+</sup> | 137.046   | 0.44                     | <0.001         |
| Lactate                        | [M - H] <sup>-</sup> | 89.024    | 0.78                     | <0.001         |
| Pregnenolone sulfate           | [M - H] <sup>-</sup> | 395.19    | 0.56                     | 0.001          |
| Pyruvate                       | [M - H] <sup>-</sup> | 87.007    | 0.74                     | 0.003          |

Plasma metabolites were analyzed in fibromyalgia and control groups. The peak intensities of each metabolite were compared using Mann–Whitney U test. Fold changes were calculated by comparing metabolites differing between patients and healthy controls. FM, fibromyalgia. HC, healthy control.

**Table S11.** Pathway analysis of the selected discriminative metabolites in fibromyalgia

| Pathway Name                                | Total | <i>p</i> value | - log(p) | Holm p   | FDR      | Impact   |
|---------------------------------------------|-------|----------------|----------|----------|----------|----------|
| Arginine biosynthesis                       | 2/14  | 0.0011137*     | 6.8      | 0.093554 | 0.093554 | 0.076140 |
| Purine metabolism                           | 2/65  | 0.023294*      | 3.7596   | 1.000000 | 0.489170 | 0.080680 |
| Taurine and hypotaurine metabolism          | 1/8   | 0.03062*       | 3.4861   | 1.000000 | 0.514410 | 0.428570 |
| Citrate cycle (TCA cycle)                   | 1/20  | 0.075082       | 2.5892   | 1.000000 | 0.788360 | 0.058560 |
| Arginine and proline metabolism             | 1/38  | 0.13858        | 1.9763   | 1.000000 | 1.000000 | 0.057860 |
| Aminoacyl-tRNA biosynthesis                 | 2/48  | 0.013014*      | 4.3418   | 1.000000 | 0.489170 | 0.000000 |
| D-Glutamine and D-glutamate metabolism      | 1/6   | 0.023039*      | 3.7706   | 1.000000 | 0.489170 | 0.000000 |
| Biotin metabolism                           | 1/10  | 0.038151*      | 3.2662   | 1.000000 | 0.534120 | 0.000000 |
| Butanoate metabolism                        | 1/15  | 0.056767       | 2.8688   | 1.000000 | 0.681210 | 0.000000 |
| Lysine degradation                          | 1/25  | 0.093099       | 2.3741   | 1.000000 | 0.868930 | 0.000000 |
| Alanine, aspartate and glutamate metabolism | 1/28  | 0.10377        | 2.2656   | 1.000000 | 0.871660 | 0.048080 |
| Primary bile acid biosynthesis              | 1/46  | 0.16561        | 1.7981   | 1.000000 | 1.000000 | 0.007580 |

FDR, false discovery rate. TCA cycle, the citric acid cycle. \*statistically significant.

**Table S12.** Phenotypic characteristics of FM with pain dominant symptoms (FM-P) and FM with mixed pain and soreness symptoms (FM-PS)

|                                      | FM-P           | FM-PS            |
|--------------------------------------|----------------|------------------|
| Number (percentage)                  | 24 (47.1%)     | 27 (52.9%)       |
| <b>Manifestation</b>                 |                |                  |
| Correlation of NRS-P and NRS-S       | No             | Yes              |
| Correlation of WPI and WSI           | No             | Yes              |
| <b>Therapeutic response</b>          |                |                  |
| NRS-P                                | Yes            | Yes              |
| NRS-S                                | Yes            | Delayed response |
| Symptom severity score               | Yes            | No               |
| FIQR score                           | Yes            | No               |
| <b>Metabolic expression (vs HCs)</b> |                |                  |
| Metabolomic phenotype                | Less distinct  | More distinct    |
| Increased MDA level                  | Nonsignificant | Significant      |

FIQR, Revised Fibromyalgia Impact Questionnaire. NRS-P, numeric rating score for pain. NRS-S, numeric rating score for soreness. WPI, widespread pain index. WSI, widespread soreness index. MDA, malondialdehyde. HCs, healthy controls.
